# Supplementary material for: Ethnoveterinary Practices and Ethnobotanical Knowledge on Plants Used against Cattle Diseases among Two Communities in South Africa
Source: MDPI journal article supplement (doi:10.3390/plants11131784), 2022-07-05
Supplement: s1 [file s1]

**Supplementary Table S1.** Demographic information of the study areas.

| Population characteristics of the study areas |                      | Category        | Dinokana | Gopane |
|-----------------------------------------------|----------------------|-----------------|----------|--------|
| 1.                                            | Population           |                 | 26409    | 10035  |
| 2.                                            | Gender               | • Male          | 46.8     | 46.7   |
|                                               |                      | • Female        | 53.2     | 53.3   |
| 3.                                            | Number of households |                 | 6543     | 2691   |
| 4.                                            | Language             | • Setswana      | 92.4%    | 87.9%  |
|                                               |                      | • English       | 2.6%     | 5.7%   |
|                                               |                      | • IsiNdebele    | 1.2%     | 1.5%   |
|                                               |                      | • isiZulu       | 1.3%     | 1.1%   |
|                                               |                      | • IsiXhosa      | 0.3%     | 1.6%   |
|                                               |                      | • Other         | 2.2%     | 2.2%   |
| 5.                                            | Ethnicity            | • Black African | 99.4%    | 99.6%  |
|                                               |                      | • Coloured      | 0.2%     | 0.0%   |
|                                               |                      | • Indian/Asian  | 0.2%     | 0.2%   |
|                                               |                      | • White         | 0.1%     | 0.0%   |
|                                               |                      | • Other         | 0.1 %    | 0.1 %  |
